# Supplementary material for: Childbearing in the knowledge-based society: job-related learning demands and the transition to parenthood in Germany
Source: Research Square preprint supplement (doi:10.21203/rs.3.rs-8339394/v1), 2026-02-10
Supplement: Supplementary file 1 [file 568225bdefd8ad48ea45acfb.docx]

**Supplementary materials**

**Table A1. Summary Statistics – categorical covariates**

| Variable | levels | Female | | Male | |
| --- | --- | --- | --- | --- | --- |
| Frequency | Percent | Frequency | Percent |
| Quantile of learning demands | Not employed | 14,848 | 32.9 | 16,465 | 31.7 |
| 1st | 4,366 | 9.7 | 7,879 | 15.2 |
| 2nd | 9,290 | 20.6 | 8,035 | 15.5 |
| 3rd | 8,276 | 18.4 | 9,643 | 18.6 |
| 4th | 8,318 | 18.4 | 9,851 | 19 |
| Birth place | West Germany/West Berlin | 33,668 | 74.7 | 37,912 | 73.1 |
| East Germany/East Berlin | 6,935 | 15.4 | 9,052 | 17.5 |
| Outside Germany | 4,495 | 10 | 4,909 | 9.5 |
| Educational level | Medium or low | 21,874 | 48.5 | 25,132 | 48.4 |
| High | 23,224 | 51.5 | 26,741 | 51.6 |
| Age group | 18-19 | 10,278 | 22.8 | 9,780 | 18.9 |
| 20-24 | 14,814 | 32.8 | 15,446 | 29.8 |
| 25-29 | 10,317 | 22.9 | 12,487 | 24.1 |
| 30-34 | 5,313 | 11.8 | 7,727 | 14.9 |
| 35-39 | 2,775 | 6.2 | 4,211 | 8.1 |
| 40-45 | 1,601 | 3.6 | 2,222 | 4.3 |
| Income group | Not employed | 14,849 | 32.9 | 16,437 | 31.7 |
| Low | 4,501 | 10 | 3,336 | 6.4 |
| Medium | 23,029 | 51.1 | 24,383 | 47 |
| High | 2,719 | 6 | 7,717 | 14.9 |
| Working/education status | In education | 21,921 | 48.6 | 24,330 | 46.9 |
| Inactive | 175 | 0.4 | 146 | 0.3 |
| Unemployed | 1,083 | 2.4 | 2,102 | 4.1 |
| Employed | 21,919 | 48.6 | 25,295 | 48.8 |
| Major occupation group | Managers | 625 | 1.4 | 1,286 | 2.5 |
| Professionals | 6,074 | 13.5 | 7,659 | 14.8 |
| Technicians and associate professionals | 8,665 | 19.2 | 5,309 | 10.2 |
| Clerical Support Workers | 6,625 | 14.7 | 3,083 | 5.9 |
| Service and Sales Workers | 4,973 | 11 | 2,805 | 5.4 |
| Skilled Agricultural, Forestry and Fishery Workers | 168 | 0.4 | 862 | 1.7 |
| Craft and Related Trades Workers | 1,203 | 2.7 | 9,847 | 19 |
| Plant and Machine Operators, and Assemblers | 475 | 1.1 | 2,074 | 4 |
| Elementary Occupations | 1,442 | 3.2 | 2,483 | 4.8 |
| Not employed | 14,848 | 32.9 | 16,465 | 31.7 |
| Period | before 1990 | 10,199 | 22.6 | 9,874 | 19 |
| 1991-2003 | 23,628 | 52.4 | 26,512 | 51.1 |
| 2004-2007 | 5,598 | 12.4 | 7,346 | 14.2 |
| 2008-2012 | 4,098 | 9.1 | 5,823 | 11.2 |
| 2013-2019 | 1,508 | 3.3 | 2,218 | 4.3 |
| 2020-2022 | 67 | 0.1 | 100 | 0.2 |
| Full-/part-time schedule | Part-time | 7,773 | 17.2 | 3,987 | 7.7 |
| Full-time | 22,477 | 49.8 | 31,421 | 60.6 |
| Not employed | 14,848 | 32.9 | 16,465 | 31.7 |
| Sector | Public sector | 8,575 | 19 | 6,174 | 11.9 |
| Private sector | 21,675 | 48.1 | 29,234 | 56.4 |
| Not employed | 14,848 | 32.9 | 16,465 | 31.7 |
| Total | | 45,098 | 100 | 51,873 | 100 |

Source: Authors’ calculations based on NEPS data

**Table A2. Baseline regression results**

| **Predictors** | **Female samples**  **Model 1** | **Male samples**  **Model 2** |
| --- | --- | --- |
| Quartile of learning demands (*ref. 1st quartile*) | | |
| Not employed | 1.246 | 0.056*** |
| (0.702) | (0.046) |
| 2nd quartile | 0.947 | 1.517 |
| (0.223) | (0.710) |
| 3rd quartile | 0.881 | 1.351 |
| (0.259) | (0.658) |
| 4th quartile | 0.733 | 0.555 |
| (0.294) | (0.600) |
| Age group (*ref. 17-19*) | | |
| 20-24 | 1.484* | 3.338*** |
| (0.275) | (1.161) |
| 25-29 | 1.793** | 7.891*** |
| (0.347) | (2.727) |
| 30-34 | 1.136 | 7.108*** |
| (0.283) | (2.536) |
| 35-39 | 0.437 | 4.008*** |
| (0.194) | (1.602) |
| 40-45 | 0.203* | 1.260 |
| (0.150) | (0.763) |
| Learning demands and group (ref. 1st quartile and age 17 to 19) | | |
| Not employed and age 20 to 24 | 0.930 | 1.062 |
| (0.207) | (0.440) |
| Not employed and age 25 to 29 | 1.208 | 0.940 |
| (0.309) | (0.393) |
| Not employed and age 30 to 34 | 1.213 | 1.448 |
| (0.484) | (0.689) |
| Not employed and age 35 to 39 | 1.726 | 1.224 |
| (1.086) | (0.813) |
| Not employed and age 40 to 45 | 1.677 | - |
| (2.167) | - |
| 2nd quartile and age 20 to 24 | 0.784 | 0.610 |
| (0.200) | (0.300) |
| 2nd quartile and age 25 to 29 | 1.212 | 0.544 |
| (0.312) | (0.262) |
| 2nd quartile and age 30 to 34 | 1.808 | 0.721 |
| (0.557) | (0.355) |
| 2nd quartile and age 35 to 39 | 1.794 | 0.841 |
| (0.911) | (0.458) |
| 2nd quartile and age 40 to 45 | 0.441 | 0.617 |
| (0.457) | (0.524) |
| 3rd quartile age 20 to 24 | 0.712 | 0.674 |
| (0.220) | (0.343) |
| 3rd quartile age 25 to 29 | 1.293 | 0.588 |
| (0.396) | (0.294) |
| 3rd quartile age 30 to 34 | 2.118* | 0.852 |
| (0.734) | (0.432) |
| 3rd quartile age 35 to 39 | 3.076* | 1.226 |
| (1.599) | (0.666) |
| 3rd quartile age 40 to 45 | 0.500 | 1.458 |
| (0.525) | (1.092) |
| 4th quartile age 20 to 24 | 1.011 | 1.433 |
| (0.413) | (1.571) |
| 4th quartile age 25 to 29 | 1.440 | 1.193 |
| (0.586) | (1.294) |
| 4th quartile age 30 to 34 | 3.290** | 2.348 |
| (1.433) | (2.549) |
| 4th quartile age 35 to 39 | 4.570** | 3.184 |
| (2.657) | (3.511) |
| 4th quartile age 40 to 45 | 2.652 | 4.957 |
| (2.345) | (5.960) |
| Major occupation groups (*ref. managers*) | | |
| Professionals | 0.896 | 0.940 |
| (0.144) | (0.122) |
| Technicians and associate professionals | 0.948 | 1.032 |
| (0.149) | (0.131) |
| Clerical support workers | 0.811 | 0.752 |
| (0.140) | (0.116) |
| Service and sales workers | 0.875 | 0.814 |
| (0.155) | (0.127) |
| Skilled agricultural, forestry and fishery workers | 1.167 | 0.943 |
| (0.347) | (0.183) |
| Craft and related trades workers | 0.859 | 0.917 |
| (0.169) | (0.118) |
| Plant and machine operators, and assemblers | 1.096 | 0.847 |
| (0.239) | (0.135) |
| Elementary occupations | 0.765 | 0.928 |
| (0.158) | (0.152) |
| Income group *(ref.low)* | | |
| Not employed | 0.213*** | 10.620** |
| (0.108) | (7.686) |
| Middle | 0.950 | 1.105 |
| (0.056) | (0.120) |
| High | 0.813* | 1.793*** |
| (0.085) | (0.209) |
| Sector *(ref. public)* |  |  |
| Private sector | 0.849*** | 1.097 |
| (0.042) | (0.072) |
| Working schedule (*ref. part-time)* | | |
| Full-time | 0.627*** | 1.417** |
| (0.031) | (0.152) |
| Working/education status (*ref. employed*) | | |
| In education | 0.453*** | 0.797*** |
| (0.029) | (0.053) |
| Inactive | 1.926 | 0.938 |
| (0.676) | (0.606) |
| unemployed | 1.927*** | 1.387 |
| (0.307) | (0.261) |
| Educational level (*ref. low/middle*) | | |
| High | 0.773*** | 0.914 |
| (0.036) | (0.048) |
| Birth place (*ref. West Germany/West Berlin*) | | |
| East Germany/East Berlin | 1.740*** | 1.396*** |
| (0.097) | (0.084) |
| Outside Germany | 1.673*** | 1.953*** |
| -0.108 | (0.143) |
| Period (*ref. before 1990*) | | |
| 1991-2003 | 0.804*** | 0.841 |
| (0.053) | (0.080) |
| 2004-2007 | 0.705*** | 0.685*** |
| (0.061) | (0.075) |
| 2008-2012 | 0.722*** | 0.669*** |
| (0.069) | (0.078) |
| 2013-2019 | 0.755* | 0.773 |
| (0.103) | (0.105) |
| 2020-2022 | 0.289 | 0.157 |
| (0.289) | (0.157) |
| Constant | 0.142*** | 0.007** |
|  | (0.036) | (0.003) |
| Observations | 45,098 | 57,873 |
| Number of individuals | 3,488 | 3,267 |

Source: Authors’ analysis of data from O*NET and NEPS SC6

**
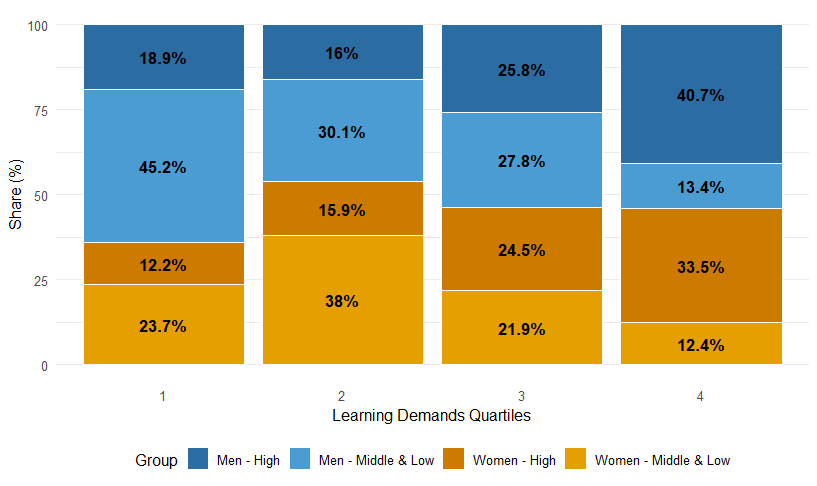
**

**Figure A1. Composition of education & sex by learning demands quartile, shares based on spell count, Germany, 1965–1985 cohorts**

Source: Authors’ analysis of data from O*NET and NEPS SC6

**
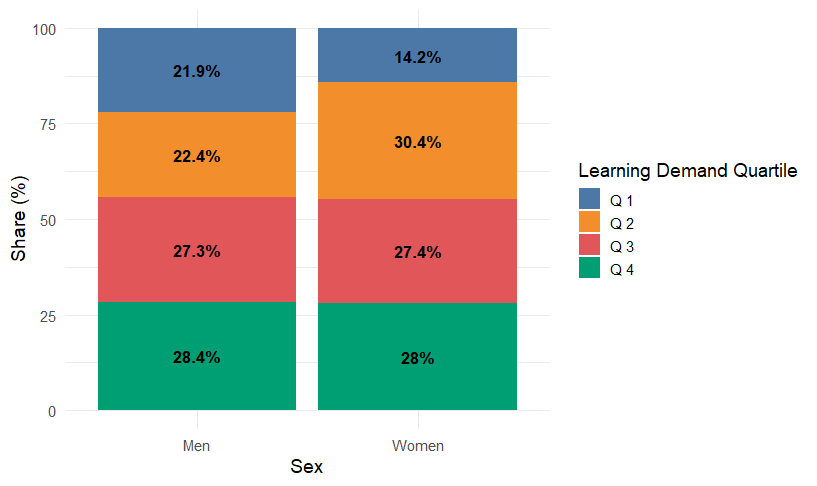
**

**Figure A2. Composition of learning demands by sex, shares based on spell count, Germany, 1965–1985 cohorts**

Source: Authors’ analysis of data from O*NET and NEPS SC6

**Figure A 3.1. Predicted probability of first birth among women by learning-demand quartile of 3-digit occupational classification, Germany, 1965–1985 cohorts**

Source: Authors’ analysis of data from O*NET and NEPS SC6

**Figure A 3.2. Predicted probability of first birth among men by learning-demand quartile of 3-digit occupational classification, Germany, 1965–1985 cohorts**

Source: Authors’ analysis of data from O*NET and NEPS SC6

**Figure A4.1 Predicted probability of first birth among women by learning-demand quartile using different income imputation methods, Germany, 1965–1985 cohorts**

Source: Authors’ analysis of data from O*NET and NEPS SC6

**Figure A4.2 Predicted probability of first birth among men by learning-demand quartile using different income imputation methods, Germany, 1965–1985 cohorts**

Source: Authors’ analysis of data from O*NET and NEPS SC6
